# Supplementary material
Source: PubMed Central journal article supplement (PMC3986007)

12/24/2013

**Strictly Conserved Lysine of Prolyl-tRNA Synthetase Editing Domain Facilitates Binding and Positioning of Misacylated tRNA<sup>Pro</sup>**

Thomas G. Bartholow<sup>†</sup>, Brianne L. Sanford<sup>§</sup>, Bach Cao<sup>†</sup>, Heidi L. Schmit, James M. Johnson<sup>†</sup>, Jet Meitzner<sup>†</sup>, Sudeep Bhattacharyya<sup>†\*</sup>, Karin Musier-Forsyth<sup>§\*</sup>, and Sanchita Hati<sup>†\*</sup>

<sup>†</sup>Department of Chemistry, University of Wisconsin–Eau Claire, WI, 54702

<sup>§</sup>Department of Chemistry and Biochemistry, Center for RNA Biology, The Ohio State University, Columbus, OH, 43210

\*To whom correspondence should be addressed: S.B.: phone: 715-836-2278; fax: 715-836-4979; email: [bhattas@uwec.edu](mailto:bhattas@uwec.edu); K.M.F.: phone: 614-292-2021; fax: 614-688-5402; email: [musier@chemistry.ohio-state.edu](mailto:musier@chemistry.ohio-state.edu); S.H.: phone: 715-836-3850; fax: 715-836-4979; email: [hatis@uwec.edu](mailto:hatis@uwec.edu)

Table S1. List of primers used for site-directed mutagenesis of Ec ProRS. Bold letters represent the sites of mutation.

- |                                                              |
|--------------------------------------------------------------|
| 1. PRS_K279Et: 5'-GAGAAAACGGTT <b>G</b> AGACTCTGCTGG-3'      |
| PRS_K279Eb: 5'-CCAGCAGAGT <b>C</b> TCAACCGTTTTCTC-3'         |
| 2. PRS_E303At: 5'-CGGTGATCAC <b>GCG</b> CTGAACGAAGTTAAAGC-3' |
| PRS_E303Ab: 5'-GCTTTAACTTCGTT <b>CAGCG</b> CGTGATCACCG-3'    |
| 3. PRS_E303Dt: 5'-GGTGATCAC <b>GAC</b> CTGAACGAAGTTAAAGC-3'  |
| PRS_E303Db: 5'-GCTTTAACTTCGTT <b>CAGGTC</b> GTGATCACC-3'     |
| 4. PRS_E303Kt: 5'-GGTGATCACA <b>AG</b> CTGAACGAAGTTAAAGC -3' |
| PRS_E303Kb: 5'-GCTTTAACTTCGTT <b>CAGCTT</b> GTGATCACC- 3'    |

Figure S1. Cartoon representation of the 3-dimensional structure of the monomeric form of Ef ProRS (PDB code: 2J3L) (16). The targeted lysine residues (K279 and K306) and the aspartate 299 (D299) are shown by licorice representation.

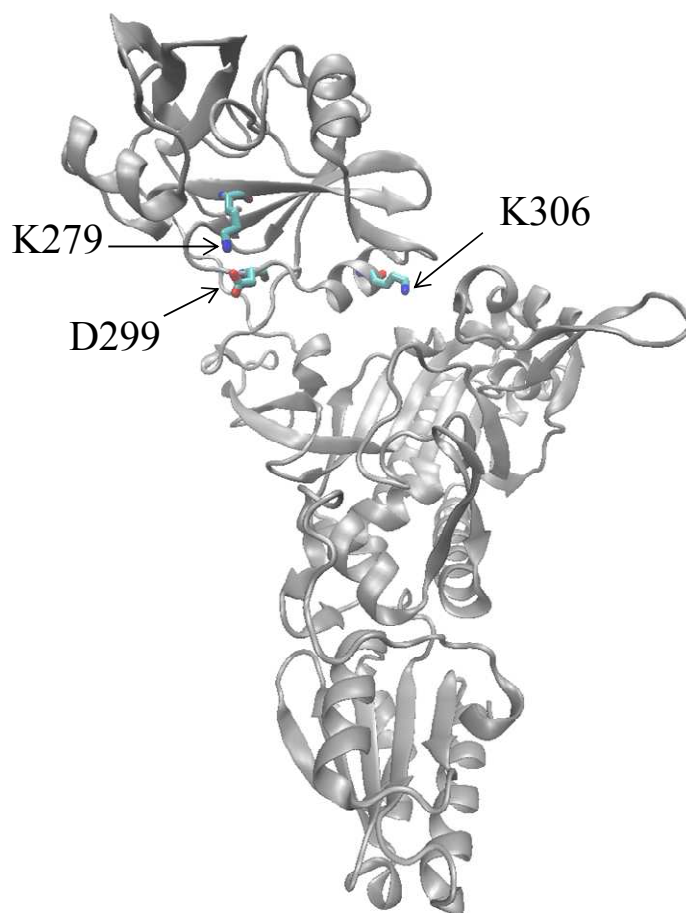

Supplement: bi401279r_si_001.pdf [file bi401279r_si_001.pdf]
